# Supplementary material for: Structure of the Large Extracellular Loop of FtsX and Its Interaction with the Essential Peptidoglycan Hydrolase PcsB in Streptococcus pneumoniae
Source: PubMed Central journal article supplement (PMC6355983; doi:10.1128/mbio.02622-18), 2019-01-29

## 24 **SUPPLEMENTAL MATERIALS AND METHODS**

25 **Construction of *E. coli* strains with protein expression plasmids.** Transformation  
26 of *E. coli*  $\alpha$ -select gold efficiency (Biolone, Bio-85027) or BL21(DE3) (NEB, C2527H) to  
27 obtain derivative strains was performed by transformation of plasmids as outlined by  
28 supplier manuals. Plasmids were derived for transformation as follows. Linear DNA  
29 amplicons with the insert of choice and the *EcoR1* and *NcoI* digest sites on the 5' and 3'  
30 end, respectively, were obtained by PCR from D39 genomic DNA. All primers used in  
31 these reactions are listed in Table S1. pHis-parallel plasmid (1) was obtained from strain  
32 IU6814 (Table S1) using the Qiaprep Spin Miniprep Kit per manufacturer's instructions  
33 (Qiagen, 27106). pHis plasmid and inserts were digested with *EcoR1* and *NcoI* for at  
34 least 1 hour at 37°C, and then were incubated at 65°C for 20 minutes to inactivate  
35 restriction enzymes. Digested pHis plasmids and inserts were then ligated together  
36 using T4 DNA ligase (NEB, M0202S) at room temperature for 2 hours. Transformation  
37 of ligated plasmids was then performed as specified by manufacturer's instructions for  
38 *E. coli*  $\alpha$ -select gold efficiency (Biolone, Bio-85027) or BL21(DE3) (NEB, C2527H).

39 **Expression and purification of  $^{15}\text{N}$ - or unlabeled FtsX<sub>ECL1</sub> and FtsX<sub>ECL1</sub> with amino**  
40 **acid changes for NMR.** Plasmids for expression of FtsX<sub>ECL1</sub> (FtsX amino acids 47-168,  
41 119 residues) and its derivatives are listed in Table S1.  $^{15}\text{N}$ -labeled and unlabeled  
42 proteins were purified as previously described (2), with the following changes. Instead of  
43 sonication, cultures expressing FtsX<sub>ECL1</sub> were lysed by passing pellets suspended in  
44 lysis buffer (25 mM Tris-HCl, pH 8, 200 mM NaCl, 10 mM imidazole) through a French  
45 Press (ThermoSpectronic French Pressure Cell Press) at 18,000 psi. Lysed cells were

46 then spun for 90 min at 12,000xg, 4°C. For the production of unlabeled protein, cultures  
47 were grown and induced in LB broth.

48 **FtsX<sub>ECL1</sub> NMR Solution Structure Refinement** Initial structure calculations with  
49 automated assignment of <sup>15</sup>N-edited and aliphatic and aromatic <sup>13</sup>C-edited NOESY  
50 spectra performed using CYANA 3.97, incorporating RDC restraints (3). The structure  
51 was further refined with manual NOE assignment using XPLOR-NIH. The solution  
52 structure builds upon the previously published backbone and sidechain assignment  
53 deposited in the BioMagResBank, under the accession number 26534 (2), and was  
54 calculated using 1713 Nuclear Overhauser Effect (NOE) distance restraints, including  
55 615 long-range NOEs, as well as 110 chemical shift-derived backbone dihedral angle  
56 restraints (4). However, the protruding nature of the helical lobe and the β-hairpin led to  
57 an inadequate network of NOEs to adequately define the orientation of these two  
58 subdomains, requiring the use of Residual Dipolar Coupling (RDC) restraints. The 121  
59 measured <sup>1</sup>D<sub>HN</sub> RDC values obtained by weak alignment in Pf1 filamentous phage  
60 correspond well to previously determined secondary structure elements (2). Inclusion of  
61 RDC restraints in refinement of the solution structure led to a strong correlation between  
62 experimentally measured RDCs and predicted RDCs back calculated from the structural  
63 ensemble using the software PALES (5). The correlation between experimental RDCs  
64 and fitted values using the crystallographic structure is also strong, indicating that the  
65 crystal structure is an accurate representation of the solution conformation. However,  
66 correlation by residues indicates the experimental RDCs match poorly in the β-hairpin  
67 and region between α2 and β5. The motions cause the experimental values to average  
68 out to 0, which is not accounted for in the fitting to static structures. The ensemble of 20

69 lowest energy structures have been deposited in the Protein Data Bank (accession  
70 code 6MK7).

71 **Cloning, expression and purification of FtsX<sub>ECL1</sub> for crystallization.** FtsX<sub>ECL1</sub> from  
72 *S. pneumoniae* D39 (residues 49-166, 117 residues) was purified by using the tandem  
73 affinity CHiC-tag as previously described by (6). In brief, FtsX<sub>ECL1</sub> fused to the CHiC-tag  
74 by overlap extension PCR was cloned into the expression vector pRSET A (Invitrogen).  
75 *E. coli* BL21 (DE3) (Invitrogen) cells containing the plasmid were grown at 37°C with  
76 shaking. When reaching OD<sub>600</sub> ~0.5, expression of CHiC-fused FtsX<sub>ECL1</sub> was induced by  
77 adding 0.1 mM isopropyl-β-D-thiogalactopyranoside (IPTG). After a 3 hr incubation at  
78 28° C cells from 2 L of cell culture were harvested at 5,000xg and resuspended in 40 ml  
79 10 mM Tris-HCl (pH 7.4) containing 100 mM NaCl. The cells were lysed by adding  
80 lysozyme to a final concentration of 1 mg/ml (Sigma Aldrich). CHiC-FtsX<sub>ECL1</sub> was  
81 purified from the soluble protein fraction by DEAE-cellulose affinity chromatography as  
82 described by (7). The CHiC-tag was then separated from FtsX<sub>ECL1</sub> by digestion with  
83 TEV Protease (Invitrogen) at 30°C for 3 h. The free CHiC-tag, undigested CHiC-  
84 FtsX<sub>ECL1</sub> and TEV Protease, all of which contain a 6xHis-tag, were removed by Ni<sup>2+</sup>-  
85 NTA affinity chromatography. The flow-through which contained FtsX<sub>ECL1</sub> was  
86 concentrated using an Amicon Ultra 15 mL Centrifugal Filter (3 kDa molecular weight  
87 cut-off) to a final concentration of 15 mg/ml in 10 mM Tris-HCl (pH 7.4) and 50 mM  
88 NaCl.

89 **Expression and purification of <sup>15</sup>N or unlabeled PcsB coiled coil domain.** Plasmids  
90 for expression of PcsB coiled coil domain (PcsB-CC, amino acids 47-267 or PcsB-CC,  
91 amino acids 47-254) and are listed in Table S1. PcsB-CC (47-267) and PcsB-CC (47-

92 254) were induced and grown in the same manner as unlabeled and <sup>15</sup>N labeled  
93 FtsX<sub>ECL1</sub>. Cell pellets obtained from growth and induction were resuspended in lysis  
94 buffer (25 mM Tris-HCl, pH 8.0, 200 mM NaCl, 10 mM imidazole, 5 µg/mL DNase I, 2-3  
95 tablets of Pierce<sup>TM</sup> Protease Inhibitor (ThermoFisher Scientific, 88266)) and lysed by  
96 passing the resuspended pellet through a French Press at 18,000 psi. Lysed cells were  
97 spun for 90 min at 12,000xg, 4°C. The resulting cell pellet from lysis was discarded,  
98 and the supernatant was filtered using a 0.45 µm filter membrane. Filtered supernatant  
99 was loaded by gravity onto two columns packed with 5 mL HisPur<sup>TM</sup> Ni-NTA Resin  
100 (ThermoFisher Scientific, 88221) and preequilibrated with 10 column volumes of low  
101 imidazole buffer (25 mM Tris-HCl, pH 8.0, 200 mM NaCl, 10 mM imidazole). Resulting  
102 flow through was collected, and the columns were washed with 10 column volumes of  
103 low imidazole buffer. His-PcsB-CC proteins were eluted as 5 mL fractions from the  
104 column using high imidazole buffer (25 mM Tris-HCl, pH 8.0, 200 mM NaCl, 400 mM  
105 imidazole). 40 µL of resulting fractions were mixed with an equal volume of 2X Laemelli  
106 buffer and run on an SDS-PAGE gel (5-14% gradient gel) at 150 V for 1 hour. The  
107 resulting gel was stained with Coomassie blue and observed for the presence of His-  
108 PcsB-CC (running at approximately 25 kDa). Fractions containing His-PcsB-CC were  
109 combined, and 1 mM DTT, 1 mM EDTA, and TEV protease were added. The mixture  
110 was then incubated at 4°C overnight with rotation. The next day, an SDS-PAGE gel was  
111 run to determine if the TEV protease cleaved the His tag off of PcsB-CC (PcsB-CC ran  
112 at approximately 24 kDa). PcsB-CC was then dialyzed into low imidazole buffer  
113 overnight and the Ni-NTA column was repeated the next day, collecting the flow-through  
114 as 5 mL fractions. The resulting fractions were again run on SDS-PAGE gel (5-14%

115 gradient gel) at 150 V for 1 hour. Fractions observed to contain PcsB-CC were  
116 concentrated to 2.5 mL using an Amicon Ultra-15 centrifugal filter unit with a 10 kDa cut-  
117 off (Millipore Sigma) and buffer exchanged by a Sephadex G-25 PD-10 desalting  
118 column (GE Healthcare) into Buffer A (25 mM Tris-HCl, pH 8.0, 50 mM NaCl). Sample  
119 was then loaded onto a 6 mL Resource Q column (GE Healthcare) on an ÄKTA pure  
120 chromatography system (GE Healthcare) pre-equilibrated with Buffer A. The column  
121 was run at 6 mL/min, and PcsB-CC was eluted using a 20 column volume gradient from  
122 0-50% Buffer B (25 mM Tris-HCl, pH 8.0, 1 M NaCl), and step to 100% B over 5 column  
123 volumes. Resulting fractions were examined for presence of PcsB-CC by running 20  $\mu$ L  
124 samples mixed with an equal volume of 2X Laemmli sample buffer on an SDS-PAGE  
125 gel (5-14% gradient gel) at 150 V for 1 hour. The resulting gel was stained with  
126 Coomassie blue and observed for the presence of PcsB-CC (running at approximately  
127 24 kDa). Total PcsB-CC amount was determined by measuring the resulting sample's  
128 absorbance at 280 nm using a Shimadzu UV-2401 PC UV-Vis recording  
129 spectrophotometer, and calculated using Beer's Law and the extinction coefficient of  
130 PcsB-CC ( $2980 \text{ M}^{-1}\text{cm}^{-1}$ ) at 280 nm. The extinction coefficient was determined by the  
131 input of the amino acid sequence into the ExPASy ProtParam tool  
132 (<http://web.expasy.org/protparam/>). Purified proteins were stored at  $-70^{\circ}\text{C}$ . Purified  
133 PcsB-CC (47-267) had a double band that co-migrated on an SDS-PAGE gel. MALDI  
134 and LC-MS/MS determined that full length PcsB-CC (47-267) was present in both of  
135 these bands, indicating that we had only full-length PcsB-CC (47-267) present in our  
136 purified samples.

137 **Expression and purification of His tagged PcsB coiled coil domain** *E. coli* strains  
138 containing plasmids expressing His-PcsB-CC (47-267) and His-PcsB-CC (47-254)  
139 (Table S1) were induced, grown, and purified in the same manner as outlined for N<sup>15</sup> or  
140 unlabeled PcsB coiled coil domain, with the following exceptions. His-PcsB-CC (47-267)  
141 was purified using the same procedure, with the exception that no TEV cleavage,  
142 dialysis, or second gravity Ni-NTA column was performed. His-PcsB-CC (47-254) was  
143 also purified in the same way as His-PcsB-CC (47-267), with the exception that after the  
144 Resource Q column His-PcsB-CC(47-267) was buffer exchanged into FtsX<sub>ECL1</sub> NMR  
145 buffer, purified protein concentration was measured, and then stored at -70°C.

146 **<sup>1</sup>H-<sup>15</sup>N TROSY (Transverse relaxation-optimized) NMR Spectroscopy** <sup>15</sup>N PcsB-CC  
147 (47-267) and <sup>15</sup>N PcsB-CC (47-254) TROSY spectra were recorded at 298 K on a  
148 Varian (Agilent) DDR 800 MHz spectrometer equipped with a cryogenic probe in the  
149 METACyt Biomolecular NMR Laboratory at Indiana University Bloomington. NMR  
150 samples contained 50 mM potassium phosphate, pH 7.0, 50 mM NaCl, 10 % v/v D<sub>2</sub>O,  
151 and 50-100 μM <sup>15</sup>N PcsB-CC (47-267) or <sup>15</sup>N PcsB-CC (47-254). For experiments  
152 detecting FtsX<sub>ECL1</sub> binding, <sup>15</sup>N PcsB-CC(47-254) was kept at 50 μM concentration, and  
153 <sup>1</sup>H-<sup>15</sup>N TROSY spectra were recorded with the following concentrations of FtsX<sub>ECL1</sub>: 0,  
154 50 μM, 200 μM, and 400 μM. nmrPipe and Sparky ver. 3.114 were used for data  
155 processing and analysis.

156 **Isothermal Titration Calorimetry** ITC titrations were performed using a MicroCal VP-  
157 ITC calorimeter (Malvern Panalytical) using 330 μM wild-type or 330 μM L115A/M119A  
158 FtsX<sub>ECL1</sub> in the syringe and 20 μM His-PcsB-CC(47-267) in the reaction cell. 6 μL  
159 injections were made at the default rate of 2 μL per second and 180 s was allowed for

160 equilibration. For all experiments, the buffer was 50 mM potassium phosphate, 50 mM  
161 NaCl, 0.5 mM EDTA, pH 7.0. All experiments were run at 25.0 °C. All reactions were  
162 conducted two times (including controls). The Origin 7.0 Software package (OriginLab  
163 Corp.) provided by MicroCal was used for fitting procedures, and a one state model was  
164 used for all fittings.

165 **Circular Dichroism Experiments** All circular dichroism (CD) spectra were recorded on  
166 a Jasco J-715 Circular Dichroism Spectropolarimeter equipped with a Peltier  
167 temperature control accessory in the Physical Biochemistry Instrumentation Facility at  
168 Indiana University, Bloomington. FtsX<sub>ECL1</sub> CD samples or PcsB-CC CD samples at 5 to  
169 10 μM dialyzed into 50 mM sodium phosphate, pH 7.0, 50 mM NaF. Spectra were  
170 recorded in a 1 mM cuvette, with the following parameters: sensitivity at 100 mdeg,  
171 starting and ending wavelength at 180-250 nm, data pitch at 1.0 nm, scanning mode  
172 continuous, scanning speed at 200 nm/min, response at 1 sec, band width at 1 nm,  
173 wavelength interval at 1 nm, and temperature at 25°C for PcsB-CC CD experiments and  
174 15°C for FtsX<sub>ECL1</sub> CD experiments. Raw data output of spectra was baseline subtracted  
175 and plotted using GraphPad Prism 5 (GraphPad Software, Inc.).

176 **Analysis of proteins by LC-MS ESI and LC-MS/MS** To confirm protein identity and  
177 molecular weight, wild-type FtsX<sub>ECL1</sub>, W123A, F126A, N131A FtsX<sub>ECL1</sub>, L115A/M119A  
178 FtsX<sub>ECL1</sub>, <sup>15</sup>N PcsB-CC (47-254), <sup>15</sup>N PcsB-CC (47-267), His-PcsB-CC (47-267), and  
179 His-PcsB-CC (47-267) were purified as outlined previously in *Supplemental Materials*  
180 *and Methods*. 25-75 μM purified protein was run as a 5 μL injection on a  
181 Waters/Micromass LCT Classic KC-379 (Waters) equipped with a Zorbax C4-SB300  
182 (0.5 x 150 mm) column (Phenomenex), with a 20 minute linear gradient of 90% solvent

183 A (95% H<sub>2</sub>O, 5% CH<sub>3</sub>CN, 0.1% HCOOH) to 90% solvent B (95% CH<sub>3</sub>CN, 5% H<sub>2</sub>O,  
184 0.1% HCOOH). Resulting LC-MS data was analyzed using MassLynx (Waters).  
185 Expected molecular weights as calculated by the online ExPASy ProtParam tool (as  
186 previously referenced) and the addition of the appropriate isotope weight were  
187 compared to experimental molecular weights to confirm protein identify.

188 To confirm the identity of the two protein bands resulting from the isolation of  
189 PcsB-CC (47-267), 5 µg of pure protein sample was mixed with 20 µL of 2X Laemelli  
190 sample buffer, and boiled for 10 minutes. The resulting sample was run on 15% SDS-  
191 PAGE gel for 2 hrs at 150 V. The gel was incubated and stained with Coomassie Blue,  
192 and then examined for the presence of the two protein bands. Gel fragments for each  
193 band were extracted using a razor blade, by hand, and placed in a 1.5 mL Eppendorf  
194 tube. Gel fragments were given to the IU Biological Mass Spec Facility, who extracted  
195 and ran samples by LC-MS/MS (<http://www.chem.indiana.edu/bms/>).

196 **Multiple sequence alignment of FtsX(ECL1)<sub>Spn</sub> with the FtsX amino acid sequence**  
197 **from other organisms** To obtain an amino acid multiple sequence alignment of  
198 FtsX(ECL1)<sub>Spn</sub> with FtsX from other organisms, FtsX amino acid sequences from *S.*  
199 *pneumoniae* D39, *M. tuberculosis* H37Rv, *E. coli* K12, *S. gordonii* Challis CH1, *S. mitis*  
200 SK637, *S. mutans* UA519, *S. pyogenes* MGAS1882, *B. cereus* B4264, and *B. subtilis*  
201 2014-3557 were obtained from PubMed Gene Database on 9 July 2017. Amino acid  
202 sequences were entered into the Clustal Omega webserver  
203 (<http://www.ebi.ac.uk/Tools/msa/clustalo/>). The resulting multiple sequence alignment  
204 was entered into the ESPript 3.0 webserver (<http://esprict.ibcp.fr/ESPript/ESPript/>) to



205 obtain an overlay of the known secondary structure from FtsX<sub>Mtb</sub> with the multiple  
206 sequence alignment.

207 **Construction of *S. pneumoniae* strains.** Transformation of D39  $\Delta cps$  (IU1945) to  
208 obtain derivative strains (Table S1) was performed with linear DNA amplicons made by  
209 fusion PCR as described previously (8). Primers used to construct D39  $\Delta cps$  derivative  
210 strains are listed in Table S1. Constructed strains were confirmed by PCR and DNA  
211 sequencing of the chromosomal region corresponding to the linear amplicon and  
212 surrounding regions.

213 **Construction of FtsX depletion strain and strains conditionally expressing point  
214 mutants.** To construct the FtsX merodiploid strain, we constructed a strain that linked  
215 the zinc-inducible promoter to *ftsX*<sup>+</sup> at the *bgaA* site and knocked out *ftsX* at the native  
216 locus by replacement with an antibiotic cassette ( $\Delta ftsX::P\text{-}aad9$ ) (Table S1). To  
217 construct strains conditionally expressing point mutants, a *rpsL1* strain (IU1824) with  
218  $P_{Zn}\text{-}ftsX^+$  at the *bgaA* site was transformed with [*kan-rpsL*<sup>+</sup>]-*ftsX*<sup>+</sup> at the native *ftsX* site.  
219 This strain expressed both wild type *ftsX*<sup>+</sup> and [*kan-rpsL*<sup>+</sup>]-*ftsX*<sup>+</sup> when zinc was added to  
220 the media. We then transformed markerless alleles of *ftsX* with point mutations in the  
221 presence of zinc, selecting for streptomycin resistance and kanamycin sensitivity. For  
222 strains and primers, see Table S1.

223 **Western blotting analysis and immunodetection.** For detection of FtsX expression  
224 levels, the following sample isolation procedure was used. Strains for western blot  
225 analysis were inoculated from frozen glycerol stocks into BHI, serial diluted, and  
226 incubated for 10-12 hours statically at 37°C in 5% CO<sub>2</sub> overnight. The next day,  
227 cultures from OD<sub>620</sub>  $\approx$  0.05 to 0.4 were diluted into fresh BHI to OD<sub>620</sub>  $\approx$  0.003 in 25 mL

228 volumes, and two identical cultures for each strain were prepared, one with 0.45 mM  
229 ZnCl<sub>2</sub> and 0.045 MnSO<sub>4</sub> and one without. Growth was monitored turbidimetrically with a  
230 Genesys 2 spectrophotometer (Thermo Scientific), and at 6 hours post dilution cultures  
231 were spun at 12,000xg for 5 min at 4°C. Supernatants were discarded and pellets were  
232 resuspended in 1.5 mL of 20 mM potassium phosphate, pH 7.5, 140 mM NaCl.  
233 Samples were transferred to individual 2 mL Lysing Matrix B Fast Prep tubes (MP  
234 Biomedicals, 116911050) and samples were lysed at 4°C using a FastPrep-24 (MP  
235 Biomedicals) with the following settings repeated three times: Speed, 6.0 m/s, Adapter,  
236 24x2, Time 40 sec. After the third run, samples were placed immediately on ice and  
237 spun at 12,000xg for 1 min at room temperature. Samples were then transferred to 3.2  
238 mL Beckman polypropylene ultracentrifuge tubes (Beckman Coulter, 362333) and  
239 centrifuged in a TLA-100.4 rotor in an Optima TLX ultracentrifuge (Beckman Coulter) at  
240 100,000xg for 45 min at 4°C. After ultracentrifugation, supernatants were discarded and  
241 pelleted membranes were resuspended in 100-400 µL membrane resuspension buffer  
242 (20 mM potassium phosphate, pH 7.5, 140 mM NaCl, 0.02% n-Dodecyl β-D-maltoside).  
243 The Bio-Rad DC™ protein assay kit I was used to determine total protein concentrations  
244 of samples using a standard curve of 0.1 to 3.0 mg/mL of BSA. Absorbance of samples  
245 (750 nm) was determined in a 96-well plate reader (Synergy H1 Hybrid Reader,  
246 BioTek), and protein concentration was determined. Samples were diluted with 2X  
247 Laemlli SDS loading buffer (Bio-Rad) and incubated at 95°C for 10 min. 12.5 µg of total  
248 protein was loaded per sample onto a 4-15% precast gradient SDS-PAGE gel (Bio-Rad,  
249 4561084) and subjected to electrophoresis for 1 hour at 150 V. Proteins were  
250 transferred to a nitrocellulose membrane and probed with polyclonal rabbit α-FtsX

251 (1:500, see experimental procedures for production) primary antibody and ECL anti-  
252 rabbit IgG horseradish peroxidase linked whole antibody (1:10,000, GE Healthcare,  
253 NA93AV) secondary antibody in TBST (Tris-Buffered Saline, 0.02% Tween). Antibody  
254 signal was detected by incubating membranes with Amersham ECL Western Blotting  
255 Detection Reagent (GE Healthcare, RPN2106) and detecting chemiluminescent signals  
256 from protein bands using an IVIS imaging system with a 1 min exposure as described in  
257 previously (9).

258 To verify protein loading was similar across all lanes, after detection blots were  
259 stripped using 15 mL of Restore PLUS Western Blot Stripping Buffer (Thermo Fisher  
260 Scientific, 46430) for 15 minutes at room temperature, and rinsed two times with TBST  
261 briefly. Alternatively, blots were placed in 45 mL of Stripping Buffer X (2% SDS, 62.5  
262 mM Tris-HCl, pH 6.8, 110 mM  $\beta$ -mercaptoethanol) for 45 min at 50°C. Blots were briefly  
263 rinsed with water twice, and washed with TBST for 5 min twice, at room temperature.  
264 After stripping, blots were then probed with  $\alpha$ -MreC primary antibody as previously  
265 described (10) and ECL anti-rabbit IgG horseradish peroxidase linked whole antibody  
266 as stated previously. Antibody signal was detected as stated previously in *Supplemental*  
267 *Materials and Methods*.

268 **Production of  $\alpha$ -FtsX** FtsX<sub>ECL1</sub> was purified as outlined previously in *Supplemental*  
269 *Materials and Methods*. For antibody production, purified FtsX<sub>ECL1</sub> was sent to  
270 ThermoFisher Scientific ([https://www.thermofisher.com/us/en/home/life-](https://www.thermofisher.com/us/en/home/life-science/antibodies/custom-antibodies/custom-antibody-production/custom-polyclonal-antibody-production.html)  
271 [science/antibodies/custom-antibodies/custom-antibody-production/custom-polyclonal-](https://www.thermofisher.com/us/en/home/life-science/antibodies/custom-antibodies/custom-antibody-production/custom-polyclonal-antibody-production.html)  
272 [antibody-production.html](https://www.thermofisher.com/us/en/home/life-science/antibodies/custom-antibodies/custom-antibody-production/custom-polyclonal-antibody-production.html)). Polyclonal antibodies were produced in rabbits, using the 70  
273 day protocol. Day 58 raw serum was used as 'polyclonal rabbit  $\alpha$ -FtsX'.

274 **REFERENCES**

- 275 1. Sheffield P, Garrard S, Derewenda Z. 1999. Overcoming expression and  
276 purification problems of RhoGDI using a family of "parallel" expression vectors.  
277 *Protein Expr Purif* 15:34-9.
- 278 2. Fu Y, Bruce KE, Rued B, Winkler ME, Giedroc DP. 2016. <sup>1</sup>H, <sup>13</sup>C, <sup>15</sup>N  
279 resonance assignments of the extracellular loop 1 domain (ECL1) of  
280 *Streptococcus pneumoniae* D39 FtsX, an essential cell division protein. *Biomol*  
281 *NMR Assign* 10:89-92.
- 282 3. Guntert P. 2004. Automated NMR structure calculation with CYANA. *Methods*  
283 *Mol Biol* 278:353-78.
- 284 4. Shen Y, Delaglio F, Cornilescu G, Bax A. 2009. TALOS+: a hybrid method for  
285 predicting protein backbone torsion angles from NMR chemical shifts. *J Biomol*  
286 *NMR* 44:213-23.
- 287 5. Zweckstetter M. 2008. NMR: prediction of molecular alignment from structure  
288 using the PALES software. *Nat Protoc* 3:679-90.
- 289 6. Stamsas GA, Havarstein LS, Straume D. 2013. CHiC, a new tandem affinity tag  
290 for the protein purification toolbox. *J Microbiol Methods* 92:59-63.
- 291 7. Sanchez-Puelles JM, Sanz JM, Garcia JL, Garcia E. 1992. Immobilization and  
292 single-step purification of fusion proteins using DEAE-cellulose. *Eur J Biochem*  
293 203:153-9.
- 294 8. Tsui HC, Mukherjee D, Ray VA, Sham LT, Feig AL, Winkler ME. 2010.  
295 Identification and characterization of noncoding small RNAs in *Streptococcus*  
296 *pneumoniae* serotype 2 strain D39. *J Bacteriol* 192:264-79.

- 297 9. Wayne KJ, Sham LT, Tsui HC, Gutu AD, Barendt SM, Keen SK, Winkler ME.  
298 2010. Localization and cellular amounts of the WalRKJ (VicRKX) two-component  
299 regulatory system proteins in serotype 2 *Streptococcus pneumoniae*. J Bacteriol  
300 192:4388-94.
- 301 10. Rued BE, Zheng JJ, Mura A, Tsui HT, Boersma MJ, Mazny JL, Corona F, Perez  
302 AJ, Fadda D, Doubravova L, Buriankova K, Branny P, Massidda O, Winkler ME.  
303 2017. Suppression and synthetic-lethal genetic relationships of DeltagsB  
304 mutations indicate that GpsB mediates protein phosphorylation and penicillin-  
305 binding protein interactions in *Streptococcus pneumoniae* D39. Mol Microbiol  
306 103:931-957.
- 307 11. Sung CK, Li H, Claverys JP, Morrison DA. 2001. An rpsL cassette, janus, for  
308 gene replacement through negative selection in *Streptococcus pneumoniae*. Appl  
309 Environ Microbiol 67:5190-6.
- 310 12. Lanie JA, Ng WL, Kazmierczak KM, Andrzejewski TM, Davidsen TM, Wayne KJ,  
311 Tettelin H, Glass JI, Winkler ME. 2007. Genome sequence of Avery's virulent  
312 serotype 2 strain D39 of *Streptococcus pneumoniae* and comparison with that of  
313 unencapsulated laboratory strain R6. J Bacteriol 189:38-51.
- 314 13. Sham LT, Barendt SM, Kopecky KE, Winkler ME. 2011. Essential PcsB putative  
315 peptidoglycan hydrolase interacts with the essential FtsX<sub>Spn</sub> cell division protein  
316 in *Streptococcus pneumoniae* D39. Proc Natl Acad Sci U S A 108:E1061-9.
- 317 14. Tsui HC, Zheng JJ, Magallon AN, Ryan JD, Yunck R, Rued BE, Bernhardt TG,  
318 Winkler ME. 2016. Suppression of a deletion mutation in the gene encoding  
319 essential PBP2b reveals a new lytic transglycosylase involved in peripheral

320 peptidoglycan synthesis in *Streptococcus pneumoniae* D39. Mol Microbiol  
321 100:1039-65.

322

323

324

## 24 APPENDIX FIGURE LEGENDS

25 **Figure A1:** Cells expressing FtsX(N131D) become shorter and rounder, while cells  
26 expressing FtsX(E109Q) have no phenotype. A) Amino acid changes made mapped to  
27 the structure of FtsX<sub>ECL1</sub>. The  $\alpha$  carbon of each residue is shown as a colored sphere.  
28 The orange to red coloring on the FtsX<sub>ECL1</sub> structure represents the peak height  
29 changes in the  $^1\text{H}$ - $^{15}\text{N}$  HSQC spectra upon addition of 2 molar equivalents of PcsB-CC  
30 to FtsX<sub>ECL1</sub>. B) Representative growth curve of strains expressing FtsX(E109Q) and  
31 FtsX(N131D). These strains were grown with or without 0.45 mM ZnCl<sub>2</sub> with 0.045 mM  
32 MnSO<sub>4</sub> (indicated as +Zn). Strains shown are as follows: black circle, D39 *rpsL1*  $\Delta$ *cps*  
33 wild-type parent (1, IU1824); grey circle, IU1824 +Zn; dark blue square, D39 *rpsL1*  $\Delta$ *cps*  
34  $\Delta$ *ftsX::P-aad9//bgaA::tet-P<sub>Zn</sub>-ftsX<sup>+</sup>* (2, IU12376); light blue square, IU12376 +Zn; orange  
35 triangle, D39 *rpsL1*  $\Delta$ *cps* *ftsX*(E109Q)// *bgaA::tet-P<sub>Zn</sub>-ftsX<sup>+</sup>* (3, IU13088); light orange  
36 triangle, IU13088 +Zn; dark pink inverted triangle, D39 *rpsL1*  $\Delta$ *cps*  
37 *ftsX*(N131D)//*bgaA::tet-P<sub>Zn</sub>-ftsX<sup>+</sup>* (4, IU13089); pink inverted triangle, IU13089 +Zn. This  
38 growth curve was repeated three times with similar results. B) Representative images of  
39 strains at 6 hours growth. The genotype of the strain shown is indicated above each  
40 panel. No Zn or +Zn indicates if Zn/Mn was added. % indicates the percentage of cells  
41 in the population that are morphologically similar to the images shown. Greater than 50  
42 cells per strain, condition, and experimental repeat were analyzed. These experiments  
43 were performed three times independently with similar results. Scale bar shown is 1  $\mu\text{M}$ .  
44 D) Length, width, aspect ratio, and relative cell volume at 6 hours growth. Strains are  
45 indicated according to the numbering in panel B. Greater than 50 cells were measured  
46 per strain and condition over two experimental replicates. For statistical analysis, a

47 Kruskal-Wallis test (one-way ANOVA) with Dunn's multiple comparison post-test was  
48 used to determine if length, width, aspect ratio, and relative cell volume were  
49 significantly different between strains and conditions. ns=non significant, \* =  $p < 0.05$ , \*\*  
50 =  $p < 0.005$ , \*\*\* =  $p < 0.0005$ .

51 **Figure A2:** Cells expressing FtsX (Gly<sub>3</sub>Ser)<sub>2</sub> insertion after 78 have mild morphological  
52 defects, and no growth defects. (Gly<sub>3</sub>Ser)<sub>2</sub> represents an amino acid insertion consisting  
53 of the sequence GSSSGSSS. A) Site of amino acid insertion mapped to the structure of  
54 FtsX<sub>ECL1</sub>. The  $\alpha$  carbon of two residues (78 and 79) between which (Gly<sub>3</sub>Ser)<sub>2</sub> was  
55 inserted is shown as a colored sphere. The orange to red coloring on the FtsX<sub>ECL1</sub>  
56 structure represents the peak height changes in the <sup>1</sup>H-<sup>15</sup>N HSQC spectra upon addition  
57 of 2 molar equivalents of PcsB-CC to FtsX<sub>ECL1</sub>. B) Representative growth curve of  
58 strains expressing FtsX(Gly<sub>3</sub>Ser)<sub>2</sub> versus FtsX depletion and wild-type strains. These  
59 strains were grown with or without 0.45 mM ZnCl<sub>2</sub> supplemented with 0.045 mM MnSO<sub>4</sub>  
60 (indicated as +Zn). Strains shown are as follows: black circle, D39 *rpsL1*  $\Delta$ *cps* wild-type  
61 parent (1, IU1824); grey circle, IU1824 +Zn; dark blue square, D39 *rpsL1*  $\Delta$ *cps*  $\Delta$ *ftsX*::P-  
62 *aad9//bgaA*::*tet*-P<sub>Zn</sub>-*ftsX*<sup>+</sup> (2, IU12376); light blue square, IU12376 +Zn; dark green  
63 triangle, D39 *rpsL1*  $\Delta$ *cps* *ftsX*(Gly<sub>3</sub>Ser)<sub>2</sub>//*bgaA*::*tet*-P<sub>Zn</sub>-*ftsX*<sup>+</sup> (3, IU13463); light green  
64 triangle, IU13463 +Zn. This growth curve was repeated two times with similar results. C)  
65 Representative images of strains at 6 hours growth. The genotype of the strain shown is  
66 indicated above each panel. No Zn or +Zn indicates if Zn/Mn was added. % indicates  
67 the percentage of cells in the population that are morphologically similar to the images  
68 shown. Greater than 50 cells were counted per experimental run, per condition and  
69 strain. These experiments were performed two times independently with similar results.



70 Scale bar is equal to 1  $\mu$ M. D) Length, width, aspect ratio, and relative cell volume of  
71 strains at 6 hours growth. Strains are indicated according to the numbering in panel B.  
72 Greater than 50 cells were measured per strain and condition over two experimental  
73 replicates. For statistical analysis, a Kruskal-Wallis test (one-way ANOVA) with Dunn's  
74 multiple comparison post-test was used to determine if length, width, aspect ratio, and  
75 relative cell volume were significantly different between strains and conditions. ns=non  
76 significant, \* =  $p < 0.05$ , \*\* =  $p < 0.005$ , \*\*\* =  $p < 0.0005$ .

77 **Figure A3:** Expression of FtsX with an amino acid insertion in FtsX<sub>ECL1</sub> causes  
78 morphological and growth defects similar to FtsX depletion. A) Representative growth  
79 curve of strains expressing FtsX<sub>ECL1</sub> with an insertion of sequence GGGSGGGS after  
80 residue 51 (denoted as N-term ECL1 (Gly<sub>3</sub>Ser)<sub>2</sub>). These strains were grown with or  
81 without 0.45 mM ZnCl<sub>2</sub> with 0.045 mM MnSO<sub>4</sub> (indicated as +Zn in the growth curve  
82 legend). Strains shown are as follows: black circle, D39 *rpsL1*  $\Delta$ *cps* wild-type parent (1,  
83 IU1824); grey circle, IU1824 +Zn; dark blue square, D39 *rpsL1*  $\Delta$ *cps*  $\Delta$ *ftsX*::P-  
84 *aad9//bgaA*::*tet*-P<sub>Zn</sub>-*ftsX*<sup>+</sup> (2, IU12376); light blue square, IU12376 +Zn; dark pink  
85 triangle, D39 *rpsL1*  $\Delta$ *cps* *ftsX* N-term ECL1 (Gly<sub>3</sub>Ser)<sub>2</sub>//*bgaA*::*tet*-P<sub>Zn</sub>-*ftsX*<sup>+</sup> (3, IU12629);  
86 pink triangle, IU12629 +Zn. This growth curve was repeated three times with similar  
87 results. B) Representative growth curve of strains expressing FtsX<sub>ECL1</sub> with an insertion  
88 of GGGSGGGS after residue 173 (denoted as C-term ECL1 (Gly<sub>3</sub>Ser)<sub>2</sub>). Strains were  
89 grown as described in part A of this figure legend. Strains shown are as follows: black  
90 circle, D39 *rpsL1*  $\Delta$ *cps* wild-type parent (1, IU1824); grey circle, IU1824 +Zn; dark blue  
91 square, D39 *rpsL1*  $\Delta$ *cps*  $\Delta$ *ftsX*::P-*aad9//bgaA*::*tet*-P<sub>Zn</sub>-*ftsX*<sup>+</sup> (2, IU12376); light blue  
92 square, IU12376 +Zn; orange inverted triangle, D39 *rpsL1*  $\Delta$ *cps* *ftsX* C-term ECL1

93 (Gly<sub>3</sub>Ser)<sub>2</sub>//*bgaA::tet-P<sub>Zn</sub>-ftsX*<sup>+</sup> (4, IU12869); light orange inverted triangle, IU12869  
94 +Zn. This growth curve was repeated three times with similar results. C) Representative  
95 images of strains at 6 hours growth. The genotype of the strain shown is indicated  
96 above each panel. No Zn indicates strains grown without Zn, and +Zn indicates strains  
97 growth with Zn. % indicates the percentage of cells in the population that are  
98 morphologically similar to the images shown. Greater than 50 cells were counted per  
99 experimental run, per condition and strain. These experiments were performed three  
100 times independently with similar results. Scale bar shown is equal to 1 μM. D) Length,  
101 width, aspect ratio, and relative cell volume of strains at 6 hours growth. Strains are  
102 indicated according to the numbering in panel A. Measurements for FtsX C-term ECL1  
103 (Gly<sub>3</sub>Ser)<sub>2</sub> are not shown, as this strain did not express FtsX in the absence of zinc.  
104 Greater than 50 cells were measured per strain and condition over two experimental  
105 replicates. For statistical analysis, a Kruskal-Wallis test (one-way ANOVA) with Dunn's  
106 multiple comparison post-test was used to determine if length, width, aspect ratio, and  
107 relative cell volume were significantly different between strains and conditions. ns=non  
108 significant, \* = p<0.05, \*\* = p<0.005, \*\*\* = p<0.0005.

109

110

APPENDIX FIGURE A1

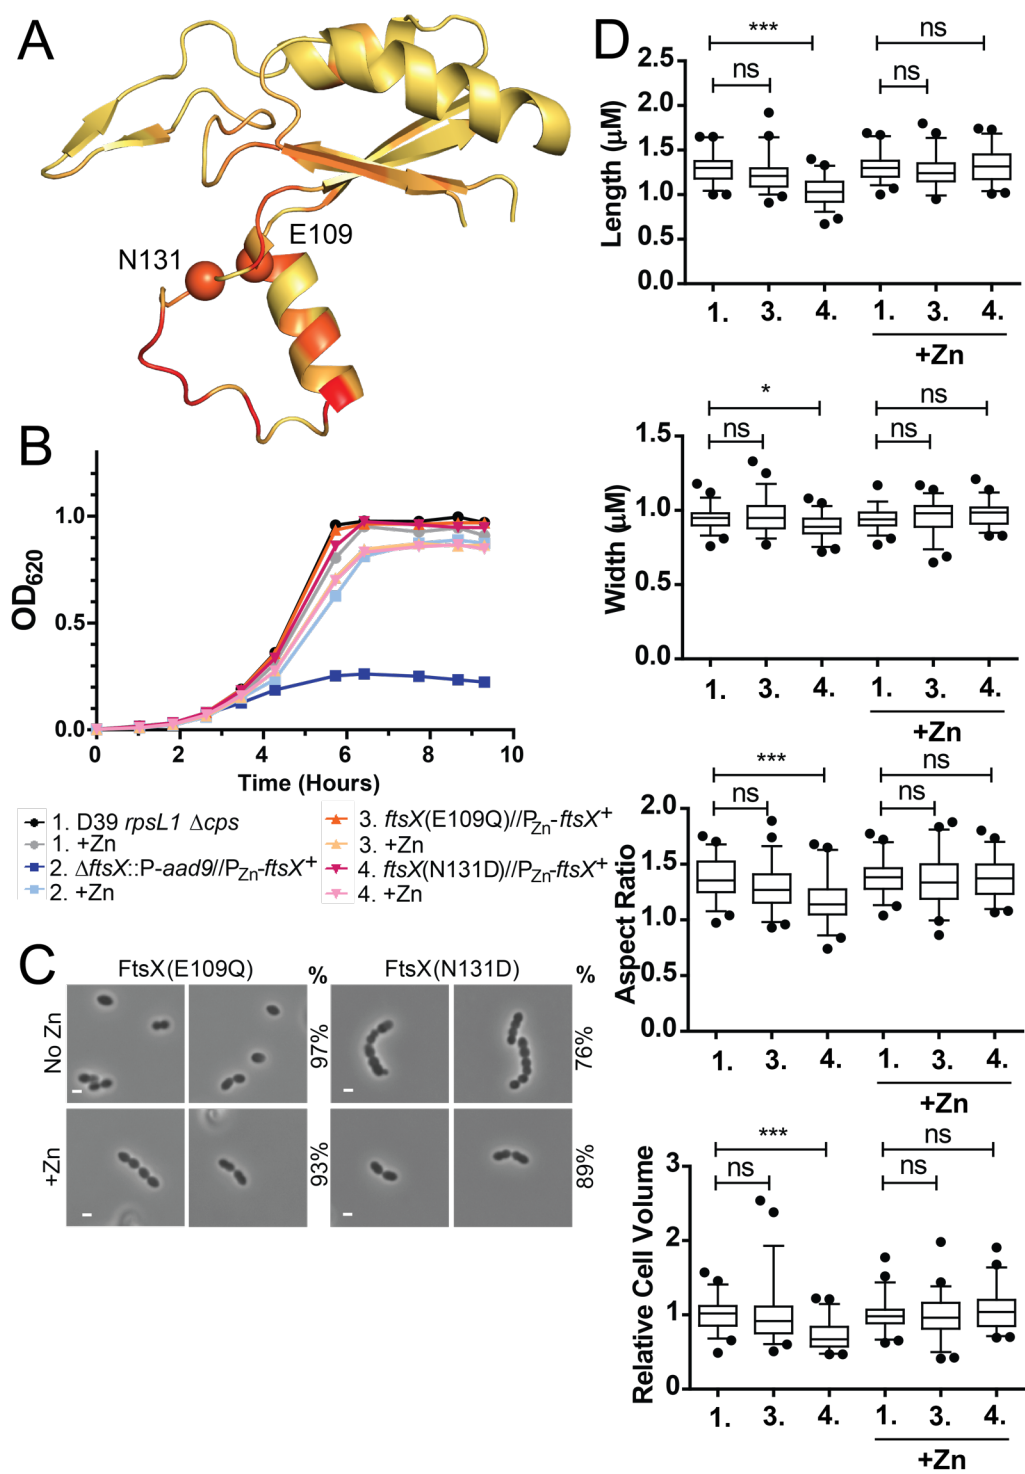

APPENDIX FIGURE A2

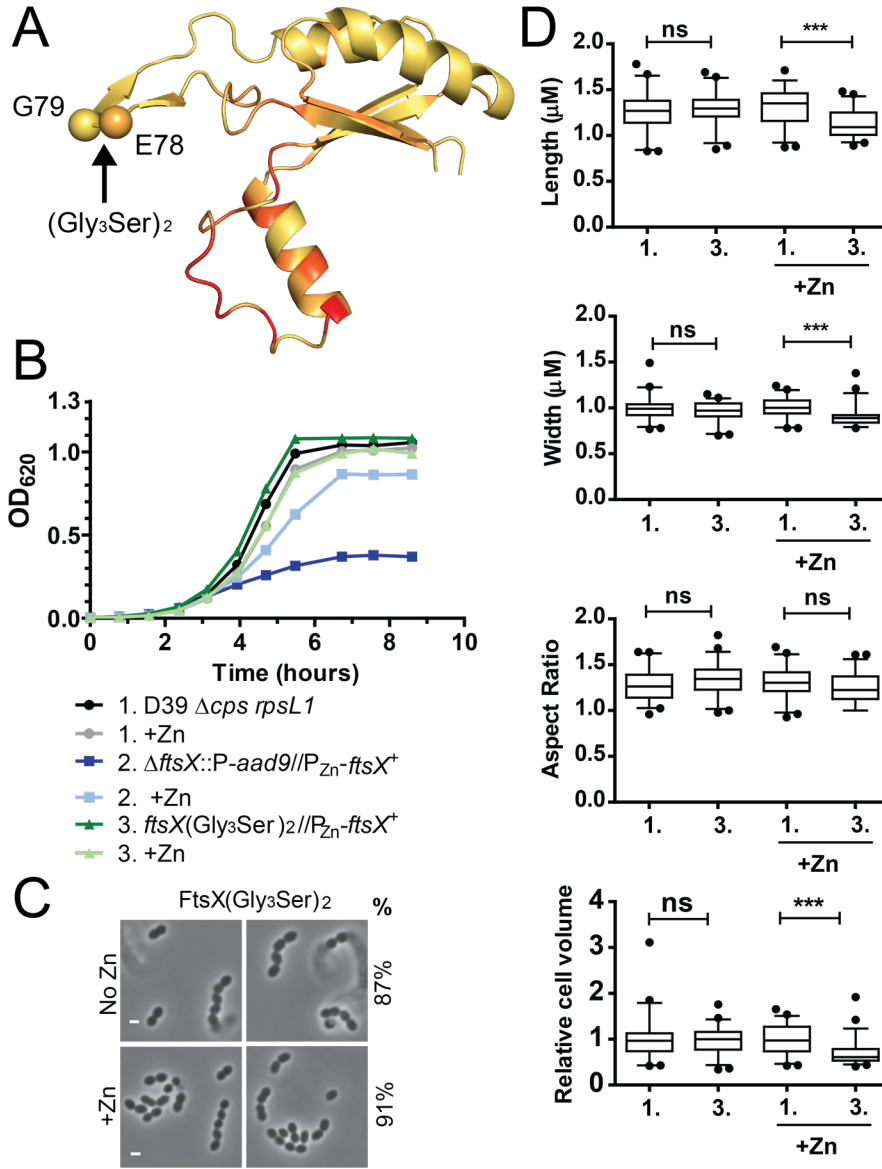

APPENDIX FIGURE A3

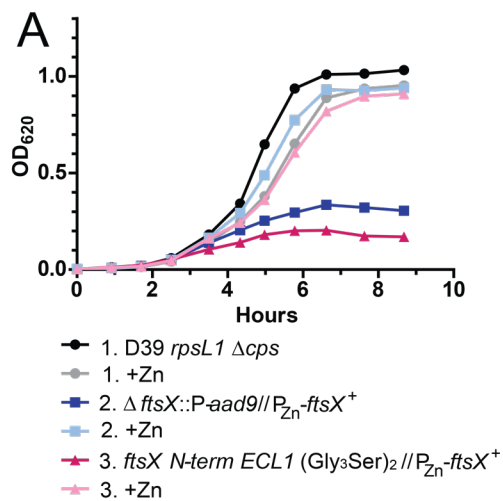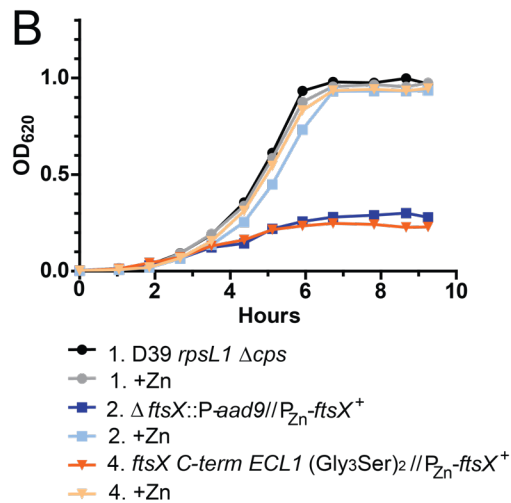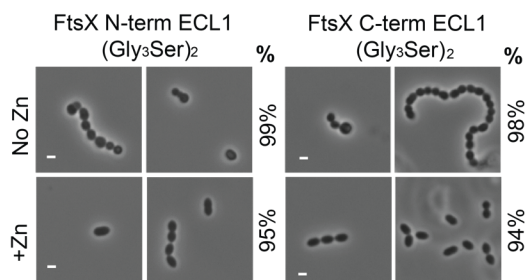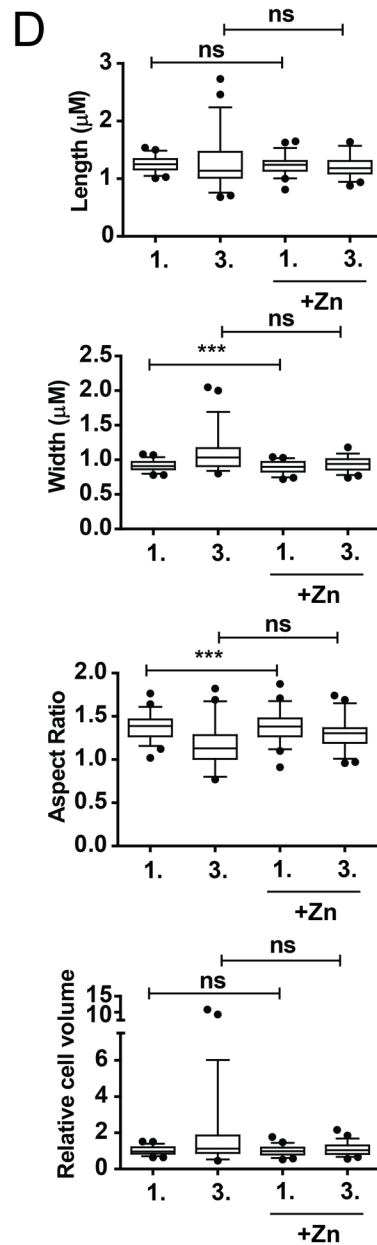

Supplement: mBio.02622-18-s0001.pdf [file mBio.02622-18-s0001.pdf]
